# Supplementary material
Source: publisher figshare collection journal article supplement (https://diabetesjournals.figshare.com/articles/dataset/_/23537514)
Supplement: Supplementary file 1 [file 2]

## Supplementary Appendix

### **Procedure S1. Subjects' eligibility and exclusion criteria**

Subjects were eligible if they (i) were a male or female over 20 years of age at the time of their biopsies; (ii) reported drinking less than 21 standard drinks per week on average for men and 14 standard drinks on average per week on average for women; and (iii) had been clinically diagnosed with NAFLD according to the American Association for the Study of Liver Diseases guidelines (1).

Subjects were excluded if they had any of the following: hepatic virus infections (hepatitis B and C, cytomegalovirus, and Epstein–Barr virus), primary biliary cirrhosis, autoimmune hepatitis, sclerosing cholangitis, hemochromatosis, Wilson's disease, and drug-induced liver injury or biliary obstruction.

### **Procedure S2. Data collection**

The diagnosis of diabetes mellitus was based on the American Diabetes Association criteria (2). Dyslipidemia was defined as serum concentrations of triglycerides  $\geq 150$  mg/dL and LDL cholesterol  $\geq 140$  mg/dL or being currently under treatment (3). Hypertension was defined as blood pressure greater than 140/90 mmHg according to the criteria of the Japanese Society of Hypertension (4) or currently under treatment. HemoglobinA1c (HbA1c) was measured by high-performance liquid chromatography assay (Automated Glycohemoglobin Analyzer HLC-723®G11; Tosoh Inc., Tokyo, Japan). Fasting plasma glucose (FPG) levels were measured by the glucose oxidase immobilized enzyme membrane electrode method (GA08 III ; A&T Corporation., Kanagawa, Japan). Serum aspartate aminotransferase (AST), alanine aminotransferase (ALT), and gamma-glutamyltransferase (GGT) levels were measured by JSCC transferable method (LABOSPECT008α; Hitachi, Ltd. Tokyo, Japan). Serum total cholesterol, triglyceride, and HDL cholesterol levels were measured enzymatically (LABOSPECT008α; Hitachi, Ltd. Tokyo, Japan). All tests were conducted and analyzed

at the central clinical laboratory in our hospital.

### **Procedure S3. FIB-4 index**

The FIB-4 index is a noninvasive tool (i.e.,  $\text{FIB-4 index} = \text{age}[\text{years}] \times \text{aspartate aminotransferase}[\text{U/L}] / [\text{platelet count}[10^9/\text{L}] \times (\text{alanine aminotransferase}[\text{U/L}])^{1/2}]$ ) for assessing hepatic fibrosis(5)(6). The FIB-4 index is easy to use in clinical practice and has a comparable diagnostic capability for advanced fibrosis to magnetic resonance elastography (7).

### **Procedure S4. Hepatic gene expression**

RNA-sequencing (RNA-seq) was performed by using SMART-Seq® Stranded Kit (Takara Bio, Inc., Japan) and NovaSeq 6000 Sequencing System (Illumina, Inc., USA). Expression data were processed by BRB-ArrayTools (<https://brb.nci.nih.gov/BRB-ArrayTools>). The quality of the isolated RNA was estimated after electrophoresis using an Agilent 2100 Bioanalyzer (Palo Alto, CA). Pair-wised comparisons were performed to compare the gene expression between the first and second liver biopsied samples using edgeR with the generalized linear model likelihood ratio test approach (BRB-array tool). Functional ontology enrichment analysis was conducted to compare the Kyoto Encyclopedia of Genes and Genomes (KEGG) pathways. To address which components of resident cells participate in alleviating liver fibrosis and glycemic control, we performed gene set enrichment analyses using representative gene sets associated with resident cells in the human liver defined by single-cell RNA-Seq analyses (8). Liver resident cells were clustered into hepatocytes 1, 2, 3, 4, 5, and 6, cholangiocytes, central liver sinusoidal endothelial cell (LSEC), periportal LSEC, portal endothelial cells, stellate cells, inflammatory MACS, non-inflammatory MACS,  $\alpha\beta$ T cells,  $\gamma\delta$ T cells-1 and -2, NK cells, mature B cells, plasma cells, and erythroid cells (8). Functional ontology

enrichment analyses were conducted to compare each cell component distribution of the differentially expressed genes.

### **Procedure S5. Statistical analysis**

A generalized linear mixed model is useful for settings where repeated measurements are made for the same subject during longitudinal observations and handling missing or volatile parameters. Therefore, it is suitable for continuous liver biopsy studies in real-world clinical practice.

For statistical analysis, the Jonckheere–Terpstra trend test for continuous variables and the Cochran–Armitage trend test for categorical variables was used to examine associations between baseline variables and final hepatic pathology. Associations between changes in clinical parameters and the progression of liver pathology over time were examined using generalized linear mixed models adjusted for covariates.

### **References**

1. Chalasani N, Younossi Z, Lavine JE, Charlton M, Cusi K, Rinella M, Harrison SA, Brunt EM, Sanyal AJ: The diagnosis and management of nonalcoholic fatty liver disease: Practice guidance from the American Association for the Study of Liver Diseases. *Hepatology* 2018;67:328-357
2. The Expert Committee on the Diagnosis and Classification of Diabetes Mellitus: Report of the expert committee on the diagnosis and classification of diabetes mellitus. *Diabetes Care* 2003;26 Suppl 1:S5-20
3. Tamio Teramoto JS, Shun Ishibashi, Sadatoshi Birou, Hiroyuki Daida, Seitaro, Dohi

GE, Takafumi Hiro, Kazuhiko Hirobe, Mami Iida, Shinji Kihara, Makoto, Kinoshita CM, Takao Ohta, Tomonori Okamura, Shizuya Yamashita,, Yokote MYaK: Diagnostic Criteria for Dyslipidemia

Executive Summary of the Japan Atherosclerosis Society (JAS) Guidelines for the Diagnosis and Prevention of Atherosclerotic Cardiovascular Diseases in Japan —2012 Version. Journal of Atherosclerosis and Thrombosis 2012;20:655-660

4. Chapter 2. Measurement and clinical evaluation of blood pressure. Hypertension Research 2009;32:11-23

5. Sterling RK, Lissen E, Clumeck N, Sola R, Correa MC, Montaner J, M SS, Torriani FJ, Dieterich DT, Thomas DL, Messinger D, Nelson M, Investigators AC: Development of a simple noninvasive index to predict significant fibrosis in patients with HIV/HCV coinfection. Hepatology 2006;43:1317-1325

6. Shah AG, Lydecker A, Murray K, Tetri BN, Contos MJ, Sanyal AJ, Nash Clinical Research N: Comparison of noninvasive markers of fibrosis in patients with nonalcoholic fatty liver disease. Clin Gastroenterol Hepatol 2009;7:1104-1112

7. Imajo K, Kessoku T, Honda Y, Tomeno W, Ogawa Y, Mawatari H, Fujita K, Yoneda M, Taguri M, Hyogo H, Sumida Y, Ono M, Eguchi Y, Inoue T, Yamanaka T, Wada K, Saito S, Nakajima A: Magnetic Resonance Imaging More Accurately Classifies Steatosis and Fibrosis in Patients With Nonalcoholic Fatty Liver Disease Than Transient Elastography. Gastroenterology 2016;150:626-637 e627

8. MacParland SA, Liu JC, Ma XZ, Innes BT, Bartczak AM, Gage BK, Manuel J, Khuu N, Echeverri J, Linares I, Gupta R, Cheng ML, Liu LY, Camat D, Chung SW, Seliga RK, Shao Z, Lee E, Ogawa S, Ogawa M, Wilson MD, Fish JE, Selzner M, Ghanekar A, Grant D, Greig P, Sapisochin G, Selzner N, Winegarden N, Adeyi O, Keller G, Bader GD,

McGilvray ID: Single cell RNA sequencing of human liver reveals distinct intrahepatic macrophage populations. Nat Commun 2018;9:4383

Supplemental Table 1 Baseline clinical characteristics in NAFLD subjects with or without type 2 diabetes

|                                      | Total (n = 118) | Type 2 diabetes (n = 86) | Non-diabetes (n = 32) | p†     |
|--------------------------------------|-----------------|--------------------------|-----------------------|--------|
| Age (years)                          | 50.7 (14.1)     | 52.9 (13.5)              | 44.5 (14.3)           | 0.004  |
| Gender (Male : Female)               | 67 : 51         | 48 : 38                  | 19 : 13               | 0.728  |
| Duration of Type 2 diabetes (year)   |                 | 5.44 (7.34)              |                       |        |
| Hypertension, n (%)                  | 53 (44.9)       | 42 (48.8)                | 11 (34.4)             | 0.160  |
| Dyslipidemia, n (%)                  | 86 (72.9)       | 67 (77.9)                | 19 (59.4)             | 0.044  |
| Weight (kg)                          | 76.1 (18.0)     | 76.0 (18.3)              | 76.3 (17.5)           | 0.943  |
| Body-mass index (kg/m <sup>2</sup> ) | 28.8 (5.6)      | 28.8 (5.9)               | 28.9 (5.0)            | 0.676  |
| Aspartate aminotransferase (IU/L)    | 46.42 (39.1)    | 46.48 (42.4)             | 46.28 (29.2)          | 0.995  |
| Alanine aminotransferase (IU/L)      | 68.1 (48.3)     | 68.7 (50.7)              | 66.5 (41.9)           | 0.961  |
| Gamma-glutamyltransferase (IU/L)     | 74.78 (51.9)    | 78.8 (56.3)              | 63.97 (36.3)          | 0.322  |
| HbA1c (%)                            | 7.6 (2.0)       | 8.1 (2.0)                | 5.7 (0.5)             | <0.001 |
| Fasting plasma glucose (mg/dL)       | 129.2 (44.7)    | 141.0 (46.5)             | 96.2 (7.6)            | <0.001 |
| Platelets (x10 <sup>9</sup> /L)      | 222.6 (66.0)    | 221.5 (61.4)             | 225.7 (78.1)          | 0.714  |
| Total cholesterol (mg/dL)            | 193.6 (44.5)    | 190.6 (42.5)             | 201.6 (49.6)          | 0.244  |
| Triglyceride (mg/dL)                 | 149.2 (92.8)    | 159.1 (96.4)             | 120.5 (76.0)          | 0.009  |
| HDL cholesterol (mg/dL)              | 46.37 (12.0)    | 46.22 (12.2)             | 46.85 (11.6)          | 0.857  |
| Liver fibrosis stage, n (%)          |                 |                          |                       | 0.863  |
| 0                                    | 10 (8.5)        | 8 (9.3)                  | 2 (6.3)               |        |
| 1                                    | 52 (44.1)       | 37 (43.0)                | 15 (46.9)             |        |

|                                       |             |             |             |       |
|---------------------------------------|-------------|-------------|-------------|-------|
| 2                                     | 25 (21.2)   | 16 (18.6)   | 9 (28.1)    |       |
| 3                                     | 24 (20.3)   | 21 (24.4)   | 3 (9.4)     |       |
| 4                                     | 7 (5.9)     | 4 (4.7)     | 3 (9.4)     |       |
| Steatosis stage, n (%)                |             |             |             | 0.731 |
| 0                                     | 0 (0)       | 0 (0)       | 0 (0)       |       |
| 1                                     | 53 (44.9)   | 37 (43.0)   | 16 (50.0)   |       |
| 2                                     | 42 (35.6)   | 33 (38.4)   | 9 (28.1)    |       |
| 3                                     | 23 (19.5)   | 16 (18.6)   | 7 (21.9)    |       |
| Lobular inflammation stage, n(%)      |             |             |             | 0.184 |
| 0                                     | 2 (1.7)     | 0 (0)       | 2 (6.3)     |       |
| 1                                     | 38 (32.2)   | 28 (32.6)   | 10 (31.3)   |       |
| 2                                     | 64 (54.2)   | 45 (52.3)   | 19 (59.4)   |       |
| 3                                     | 1 (3.1)     | 13 (15.1)   | 14 (11.9)   |       |
| Hepatocellular ballooning stage, n(%) |             |             |             | 0.193 |
| 0                                     | 26 (22)     | 16 (18.6)   | 10 (31.3)   |       |
| 1                                     | 52 (44.1)   | 39 (45.3)   | 13 (40.6)   |       |
| 2                                     | 40 (33.9)   | 31 (36)     | 9 (28.1)    |       |
| NAFLD activity score                  | 4.63 (1.56) | 4.76 (0.16) | 4.28 (0.32) | 0.231 |
| NAFL, n (%)                           | 26 (22.0)   | 16 (18.6)   | 10 (31.3)   |       |
| NASH, n (%)                           | 92 (78.0)   | 70 (81.4)   | 22 (68.8)   |       |
| Treatment, n (%)                      |             |             |             |       |

|                      |         |           |         |       |
|----------------------|---------|-----------|---------|-------|
| Insulin              |         | 14 (16.3) |         |       |
| Sulfonylureas        |         | 18 (20.9) |         |       |
| Metformin            |         | 17 (19.8) |         |       |
| αGI                  |         | 17 (19.8) |         |       |
| DPP4i                |         | 9 (10.5)  |         |       |
| GLP-1 RA             |         | 3 (3.5)   |         |       |
| Glinide              |         | 5 (5.8)   |         |       |
| TZD                  |         | 5 (5.8)   |         |       |
| SGLT2 inhibitor      |         | 0 (0)     |         |       |
| Ursodeoxycholic acid | 3 (2.5) | 2 (2.3)   | 1 (3.1) | 0.806 |

Data are mean (SD) or n (%) unless otherwise stated.

†The between-group comparison at baseline was performed with the  $\chi^2$  test or Fisher test for categorical variables and the Mann-Whitney U test in nonparametric parameters or the two-sample t test in normal distribution for continuous parameters.



Supplemental Table 2 Generalized linear mixed model for fibrosis scores by type 2 diabetes and HbA1c adjusted with gender, age, and BMI

|                                      | Total                        |                |         |
|--------------------------------------|------------------------------|----------------|---------|
|                                      | Standardized<br>Coefficients | 95%CI          | p-value |
| Number of liver biopsies             | -0.13                        | (-0.236–0.030) | 0.011   |
| Gender                               | -0.02                        | (-0.197–0.159) | 0.834   |
| Age (years)                          | 0.37                         | (0.179–0.553)  | 0.000   |
| Body-mass index (kg/m <sup>2</sup> ) | 0.28                         | (0.113–0.450)  | 0.001   |
| Type 2 diabetes                      | -0.52                        | (-1.116–0.082) | 0.091   |
| Type 2 diabetes ×HbA1c               | 0.06                         | (-0.001–0.126) | 0.054   |

Supplemental Table 3a Baseline clinical characteristics in NAFLD subjects for hepatic gene expression analyses

|                                      | Total (n = 33) | Type 2 diabetes (n = 28) | Non-diabetes (n = 5) | p†    |
|--------------------------------------|----------------|--------------------------|----------------------|-------|
| Age (years)                          | 49.0 (13.4)    | 50.8 (12.5)              | 39 (15.1)            | 0.066 |
| Gender (Male : Female)               | 13:20          | 12:16                    | 1:4                  | 0.335 |
| Duration of Type 2 diabetes (year)   |                | 3.9 (4.4)                |                      |       |
| Hypertension, n (%)                  | 17 (51.5)      | 15 (53.6)                | 2 (40)               | 0.576 |
| Dyslipidemia, n (%)                  | 27 (81.8)      | 24 (85.7)                | 3 (60)               | 0.170 |
| Weight (kg)                          | 78.0 (21.9)    | 79.1 (23.2)              | 72.2 (12.2)          | 0.524 |
| Body-mass index (kg/m <sup>2</sup> ) | 29.7 (7.4)     | 29.8 (7.9)               | 28.9 (3.4)           | 0.575 |
| Aspartate aminotransferase (IU/L)    | 38.1 (20.8)    | 37.2 (18.5)              | 43.2 (33.5)          | 1.000 |
| Alanine aminotransferase (IU/L)      | 61.8 (36.4)    | 60.4 (34.9)              | 69.6 (48.3)          | 0.715 |
| Gamma-glutamyltransferase (IU/L)     | 58.9 (34.4)    | 58.8 (34.8)              | 59.2 (35.4)          | 0.903 |
| HbA1c (%)                            | 7.9 (2.4)      | 8.2 (2.4)                | 5.7 (0.3)            | 0.002 |
| Fasting plasma glucose (mg/dL)       | 129.3 (38.6)   | 134.4 (38.7)             | 94.5 (7.8)           | 0.008 |
| Platelets (x10 <sup>9</sup> /L)      | 233.2 (58.0)   | 227.4 (57.4)             | 265.2 (56.6)         | 0.247 |
| Total cholesterol (mg/dL)            | 171.8 (52.6)   | 170.9 (53.5)             | 177.8 (53.3)         | 0.848 |
| Triglyceride (mg/dL)                 | 138.9 (76.5)   | 147.9 (76.7)             | 76.3 (38.2)          | 0.034 |
| HDL cholesterol (mg/dL)              | 47.9 (26.9)    | 47.5 (28.6)              | 50.3 (9.8)           | 0.230 |
| Liver fibrosis stage, n (%)          |                |                          |                      | 0.391 |
| 0                                    | 5 (15.2)       | 5 (17.9)                 | 0 (0)                |       |
| 1                                    | 16 (48.5)      | 11 (39.3)                | 5 (100)              |       |

|                                       |             |             |             |       |
|---------------------------------------|-------------|-------------|-------------|-------|
| 2                                     | 3 (9.1)     | 3 (10.7)    | 0 (0)       |       |
| 3                                     | 9 (27.3)    | 9 (32.1)    | 0 (0)       |       |
| 4                                     | 0 (0)       | 0 (0)       | 0 (0)       |       |
| Steatosis stage, n (%)                |             |             |             | 0.268 |
| 0                                     | 0 (0)       | 0 (0)       | 0 (0)       |       |
| 1                                     | 12 (36.4)   | 11 (39.3)   | 1 (20.0)    |       |
| 2                                     | 15 (45.5)   | 13 (46.4)   | 2 (40.0)    |       |
| 3                                     | 6 (18.2)    | 4 (14.3)    | 2 (40.0)    |       |
| Lobular inflammation stage, n(%)      |             |             |             | 0.715 |
| 0                                     | 0 (0)       | 0 (0)       | 0 (0)       |       |
| 1                                     | 8 (24.2)    | 8 (28.6)    | 0 (0)       |       |
| 2                                     | 20 (60.6)   | 15 (53.6)   | 5 (100)     |       |
| 3                                     | 5 (15.2)    | 5 (17.9)    | 0 (0)       |       |
| Hepatocellular ballooning stage, n(%) |             |             |             | 0.542 |
| 0                                     | 8 (24.2)    | 6 (21.4)    | 2 (40.0)    |       |
| 1                                     | 17 (51.5)   | 15 (53.6)   | 2 (40.0)    |       |
| 2                                     | 8 (24.2)    | 7 (25.0)    | 1 (20.0)    |       |
| NAFLD activity score                  | 4.73 (1.61) | 4.68 (0.31) | 5.00 (0.71) | 0.715 |
| NAFL, n (%)                           | 8 (24.2)    | 6 (21.4)    | 2 (40.0)    |       |
| NASH, n (%)                           | 25 (75.8)   | 22 (78.5)   | 3 (60.0)    |       |
| Treatment, n (%)                      |             |             |             |       |

|                      |       |          |       |
|----------------------|-------|----------|-------|
| Insulin              |       | 7 (25.0) |       |
| Sulfonylureas        |       | 6 (21.4) |       |
| Metformin            |       | 7 (25.0) |       |
| αGI                  |       | 4 (14.3) |       |
| DPP4i                |       | 7 (25.0) |       |
| GLP-1 RA             |       | 1 (3.6)  |       |
| Glinide              |       | 1 (3.6)  |       |
| TZD                  |       | 1 (3.6)  |       |
| SGLT2 inhibitor      |       | 0 (0)    |       |
| Ursodeoxycholic acid | 0 (0) | 0 (0)    | 0 (0) |

---

Data are mean (SD) or n (%) unless otherwise stated.

†The between-group comparison at baseline was performed with the  $\chi^2$  test or Fisher test for categorical variables and the Mann-Whitney U test in nonparametric parameters or the two-sample t test in normal distribution for continuous parameters.

Supplemental Table 3b Baseline clinical characteristics divided into 3 groups by fibrosis score in NAFLD subjects for hepatic gene expression analyses

|                                      | Fibrosis progression (n = 6) | Fibrosis unchanged (n = 20) | Fibrosis regression (n = 7) | <i>p</i> ††† |
|--------------------------------------|------------------------------|-----------------------------|-----------------------------|--------------|
| Age (years)                          | 40.5 (6.4)                   | 52.6 (14.5)                 | 46.3 (11.6)                 | 0.129        |
| Gender (Male : Female)               | 1:5                          | 9:11                        | 3:4                         | 0.461        |
| Type 2 diabetes, n (%)               | 5 (83.3)                     | 16 (80.0)                   | 7 (100)                     | 0.454        |
| Duration of Type 2 diabetes (year)   | 3.7 (4.3)                    | 4.3 (4.9)                   | 3.1 (3.7)                   | 0.940        |
| Hypertension, n (%)                  | 3 (50.0)                     | 11 (55.0)                   | 3 (42.9)                    | 0.859        |
| Dyslipidemia, n (%)                  | 3 (50.0)                     | 18 (90.0)                   | 6 (85.7)                    | 0.086        |
| Weight (kg)                          | 85.3 (28.1)                  | 72.4 (16.5)                 | 88.0 (27.4)                 | 0.181        |
| Body-mass index (kg/m <sup>2</sup> ) | 32.3 (7.6)                   | 27.6 (3.9)                  | 33.4 (12.6)                 | 0.267        |
| Aspartate aminotransferase (IU/L)    | 49.2 (34.9)                  | 35.4 (18.2)                 | 36.6 (9.7)                  | 0.772        |
| Alanine aminotransferase (IU/L)      | 82.7 (55.8)                  | 55.8 (32.5)                 | 60.9 (24.0)                 | 0.493        |
| Gamma-glutamyltransferase (IU/L)     | 57.7 (27.3)                  | 50.1 (28.7)                 | 85 (44.9)                   | 0.117        |
| HbA1c (%)                            | 8.0 (1.9)                    | 7.7 (2.7)                   | 8.3 (1.8)                   | 0.414        |
| Fasting plasma glucose (mg/dL)       | 136.2 (46.1)                 | 123.8 (39.8)                | 139.5 (28.7)                | 0.397        |
| Platelets (x10 <sup>9</sup> /L)      | 285.5 (55.6)                 | 210.1 (55.5)                | 254.3 (24.2)                | 0.013        |
| Total cholesterol (mg/dL)            | 176.8 (52.2)                 | 174.9 (44.4)                | 158.9 (76.7)                | 0.979        |
| Triglyceride (mg/dL)                 | 115.0 (77.5)                 | 137.1 (83.8)                | 164.6 (53.1)                | 0.197        |
| HDL cholesterol (mg/dL)              | 70.8 (56.3)                  | 42.5 (10.9)                 | 42.7 (9.6)                  | 0.238        |
| Liver fibrosis stage, n (%)          |                              |                             |                             | 0.106        |
| 0                                    | 2 (33.3)                     | 2 (10.0)                    | 1 (14.3)                    |              |
| 1                                    | 4 (66.7)                     | 10 (50.0)                   | 2 (28.6)                    |              |

|                      |   |          |           |          |
|----------------------|---|----------|-----------|----------|
|                      | 2 | 0 (0)    | 1 (5.0)   | 2 (28.6) |
|                      | 3 | 0 (0)    | 7 (35.0)  | 2 (28.6) |
|                      | 4 | 0 (0)    | 0 (0)     | 0 (0)    |
| NAFL, n (%)          |   | 0 (0)    | 6 (30.0)  | 2 (28.6) |
| NASH, n (%)          |   | 6 (100)  | 14 (70.0) | 5 (71.4) |
| Treatment, n (%)     |   |          |           |          |
| Insulin              |   | 1 (16.7) | 4 (20.0)  | 2 (28.6) |
| Sulfonylureas        |   | 0 (0)    | 4 (20.0)  | 2 (28.6) |
| Metformin            |   | 0 (0)    | 5 (25.0)  | 2 (28.6) |
| αGI                  |   | 2 (33.3) | 1 (5.0)   | 1 (14.3) |
| DPP4i                |   | 0 (0)    | 6 (30.0)  | 1 (14.3) |
| GLP-1 RA             |   | 0 (0)    | 1 (5.0)   | 0 (0)    |
| Glinide              |   | 1 (16.7) | 0 (0)     | 0 (0)    |
| TZD                  |   | 0 (0)    | 1 (5.0)   | 0 (0)    |
| SGLT2 inhibitor      |   | 0 (0)    | 0 (0)     | 0 (0)    |
| Ursodeoxycholic acid |   | 0 (0)    | 0 (0)     | 0 (0)    |

---

Data are mean (SD) or n (%) unless otherwise stated.

†††The ANOVA in nonparametric parameters or Kruskal– Wallis test in normal distribution for continuous parameters

Supplemental Table 3c Baseline clinical characteristics divided into 3 groups by HbA1c score in NAFLD subjects for hepatic gene expression analyses

|                                      | HbA1c elevation (n = 9 ) | HbA1c unchanged (n = 8) | HbA1c reduction (n = 16) | <i>p</i> |
|--------------------------------------|--------------------------|-------------------------|--------------------------|----------|
| Age (years)                          | 43.2 (10.4)              | 54.4 (17.3)             | 49.6 (12.2)              | 0.265    |
| Gender (Male : Female)               | 4:5                      | 2:6                     | 7:9                      | 0.641    |
| Type 2 diabetes, n (%)               | 7 (77.8)                 | 5 (62.5)                | 16 (100)                 | 0.047    |
| Duration of Type 2 diabetes (year)   | 8.4 (5.8)                | 2.1 (1.9)               | 2.6 (2.9)                | 0.022    |
| Hypertension, n (%)                  | 5 (55.6)                 | 4 (50.0)                | 8 (50.0)                 | 0.962    |
| Dyslipidemia, n (%)                  | 9 (100)                  | 5 (62.5)                | 13 (81.3)                | 0.143    |
| Weight (kg)                          | 74.9 (15.7)              | 70.6 (12)               | 83.5 (27.5)              | 0.359    |
| Body-mass index (kg/m <sup>2</sup> ) | 28.0 (4.1)               | 28.0 (4.1)              | 31.4 (9.7)               | 0.994    |
| Aspartate aminotransferase (IU/L)    | 31.2 (12.5)              | 50.9 (29.6)             | 35.6 (17.6)              | 0.300    |
| Alanine aminotransferase (IU/L)      | 58.6 (36.4)              | 73.9 (37.6)             | 57.5 (36.9)              | 0.436    |
| Gamma-glutamyltransferase (IU/L)     | 59.1 (36.1)              | 61.9 (31.1)             | 57.3 (37.0)              | 0.880    |
| HbA1c (%)                            | 6.7 (0.9)                | 6.2 (0.8)               | 9.2 (2.7)                | 0.004    |
| Fasting plasma glucose (mg/dL)       | 110.2 (22.7)             | 111.2 (18.5)            | 146.8 (43.8)             | 0.017    |
| Platelets (x10 <sup>9</sup> /L)      | 242.3 (53.8)             | 222.5 (68.2)            | 233.3 (58)               | 0.822    |
| Total cholesterol (mg/dL)            | 157.8 (45.1)             | 180.9 (39.1)            | 175.7 (62.1)             | 0.479    |
| Triglyceride (mg/dL)                 | 121.4 (35.1)             | 123.6 (72.3)            | 155.5 (93.5)             | 0.735    |
| HDL cholesterol (mg/dL)              | 44.3 (11.0)              | 46.7 (9.6)              | 50.4 (37.1)              | 0.549    |
| Liver fibrosis stage, n (%)          |                          |                         |                          | 0.371    |
| 0                                    | 3 (33.3)                 | 1 (12.5)                | 1 (6.3)                  |          |
| 1                                    | 3 (33.3)                 | 5 (62.5)                | 8 (50.0)                 |          |

|                      |   |          |          |           |
|----------------------|---|----------|----------|-----------|
|                      | 2 | 1 (11.1) | 1 (12.5) | 1 (6.3)   |
|                      | 3 | 2 (22.2) | 1 (12.5) | 6 (37.5)  |
|                      | 4 | 0 (0)    | 0 (0)    | 0 (0)     |
| NAFL, n (%)          |   | 4 (44.4) | 2 (25.0) | 2 (12.5)  |
| NASH, n (%)          |   | 5 (55.5) | 6 (75.0) | 14 (87.6) |
| Treatment, n (%)     |   |          |          |           |
| Insulin              |   | 2 (22.2) | 1 (12.5) | 4 (25.0)  |
| Sulfonylureas        |   | 4 (44.4) | 1 (12.5) | 1 (6.3)   |
| Metformin            |   | 5 (55.6) | 1 (12.5) | 1 (6.3)   |
| αGI                  |   | 1 (11.1) | 1 (12.5) | 2 (12.5)  |
| DPP4i                |   | 4 (44.4) | 2 (25.0) | 1 (6.3)   |
| GLP-1 RA             |   | 1 (11.1) | 0 (0)    | 0 (0)     |
| Glinide              |   | 1 (11.1) | 0 (0)    | 0 (0)     |
| TZD                  |   | 1 (11.1) | 0 (0)    | 0 (0)     |
| SGLT2 inhibitor      |   | 0 (0)    | 0 (0)    | 0 (0)     |
| Ursodeoxycholic acid |   | 0 (0)    | 0 (0)    | 0 (0)     |

---

Data are mean (SD) or n (%) unless otherwise stated.

†††The ANOVA in nonparametric parameters or Kruskal–Wallis test in normal distribution for continuous parameters



Supplemental Table 4 Generalized linear mixed model for fibrosis score in NAFLD subjects for hepatic gene expression analyses

|                                      | Total                     |                 |         | Type 2 diabetes mellitus  |                 |         |
|--------------------------------------|---------------------------|-----------------|---------|---------------------------|-----------------|---------|
|                                      | Standardized Coefficients | 95%CI           | p-value | Standardized Coefficients | 95%CI           | p-value |
| Number of liver biopsies             | -0.09                     | (-0.784–0.61)   | 0.802   | -0.07                     | (-0.831–0.69)   | 0.851   |
| Gender                               | -0.02                     | (-0.321–0.277)  | 0.883   | -0.01                     | (-0.335–0.323)  | 0.971   |
| Age (years)                          | -0.34                     | (-0.723–0.036)  | 0.075   | -0.32                     | (-0.739–0.105)  | 0.136   |
| Observation period (day)             | -0.01                     | (-0.831–0.813)  | 0.982   | -0.11                     | (-0.995–0.784)  | 0.811   |
| Body-mass index (kg/m <sup>2</sup> ) | 0.48                      | (0.226–0.735)   | <0.001  | 0.50                      | (0.195–0.797)   | 0.002   |
| Aspartate aminotransferase (IU/L)    | 0.50                      | (0.072–0.935)   | 0.023   | 0.45                      | (-0.044–0.94)   | 0.073   |
| Alanine aminotransferase (IU/L)      | -0.89                     | (-1.402–-0.368) | 0.001   | -0.75                     | (-1.28–-0.225)  | 0.007   |
| Gamma-glutamyltransferase (IU/L)     | 0.37                      | (0.041–0.701)   | 0.029   | 0.30                      | (0.005–0.591)   | 0.047   |
| Fasting plasma glucose (mg/dL)       | -0.14                     | (-0.394–0.116)  | 0.278   | -0.19                     | (-0.480–0.105)  | 0.200   |
| HbA1c (%)                            | 0.13                      | (-0.023–0.292)  | 0.091   | 0.15                      | (-0.028–0.327)  | 0.095   |
| Platelets (x10 <sup>9</sup> /L)      | -0.69                     | (-0.973–-0.415) | <0.001  | -0.75                     | (-1.07–-0.421)  | <0.001  |
| Total cholesterol (mg/dL)            | 0.23                      | (-0.103–0.561)  | 0.171   | 0.30                      | (-0.077–0.676)  | 0.115   |
| Triglyceride (mg/dL)                 | -0.08                     | (-0.301–0.151)  | 0.506   | -0.08                     | (-0.336–0.179)  | 0.540   |
| HDL cholesterol (mg/dL)              | -0.34                     | (-0.625–-0.057) | 0.020   | -0.43                     | (-0.767–-0.096) | 0.013   |
| Treatment                            |                           |                 |         |                           |                 |         |

|                      |       |                |       |      |                |       |
|----------------------|-------|----------------|-------|------|----------------|-------|
| Insulin              | 0.05  | (-0.239–0.329) | 0.749 | 0.03 | (-0.303–0.36)  | 0.863 |
| Metformin            | -0.03 | (-0.305–0.254) | 0.855 | 0.03 | (-0.304–0.362) | 0.858 |
| Sulfonylureas        | 0.15  | (-0.151–0.444) | 0.325 | 0.13 | (-0.229–0.49)  | 0.465 |
| Ursodeoxycholic acid | 0.08  | (-0.333–0.498) | 0.690 | 0.09 | (-0.243–0.417) | 0.594 |

---

Supplemental Table 5 Differential signaling pathways in the liver of NAFLD participants with fibrosis progression

| KEGG<br>Pathway | Pathway description                                           | Number of<br>genes | LS permutation<br>p-value | KS permutation<br>p-value | Efron-Tibshirani's GSA<br>test p-value | Up/Do<br>wn |
|-----------------|---------------------------------------------------------------|--------------------|---------------------------|---------------------------|----------------------------------------|-------------|
| hsa00071        | Fatty acid degradation                                        | 42                 | 0.00001                   | 0.00001                   | 0.005 (+)                              | Down        |
| hsa00280        | Valine, leucine and isoleucine<br>degradation                 | 44                 | 0.00001                   | 0.00001                   | 0.005 (+)                              | Down        |
| hsa04610        | Complement and coagulation cascades                           | 69                 | 0.00001                   | 0.00001                   | 0.025 (+)                              | Down        |
| hsa00100        | Steroid biosynthesis                                          | 18                 | 0.0001                    | 0.00001                   | < 0.005 (+)                            | Down        |
| hsa00640        | Propanoate metabolism                                         | 31                 | 0.00031                   | 0.00001                   | 0.005 (+)                              | Down        |
| hsa04146        | Peroxisome                                                    | 80                 | 0.00048                   | 0.00001                   | 0.065 (+)                              | Down        |
| hsa00982        | Drug metabolism - cytochrome P450                             | 64                 | 0.00066                   | 0.00001                   | 0.055 (+)                              | Down        |
| hsa00650        | Butanoate metabolism                                          | 28                 | 0.00139                   | 0.00065                   | 0.005 (+)                              | Down        |
| hsa00830        | Retinol metabolism                                            | 57                 | 0.00159                   | 0.00001                   | 0.075 (+)                              | Down        |
| hsa00900        | Terpenoid backbone biosynthesis                               | 15                 | 0.00239                   | 0.00382                   | 0.015 (+)                              | Down        |
| hsa00620        | Pyruvate metabolism                                           | 37                 | 0.00315                   | 0.00044                   | 0.04 (+)                               | Down        |
| hsa00010        | Glycolysis / Gluconeogenesis                                  | 62                 | 0.00315                   | 0.00002                   | 0.01 (+)                               | Down        |
| hsa00330        | Arginine and proline metabolism                               | 51                 | 0.0034                    | 0.02942                   | 0.075 (+)                              | Down        |
| hsa00020        | Citrate cycle (TCA cycle)                                     | 30                 | 0.00367                   | 0.00001                   | 0.01 (+)                               | Down        |
| hsa00250        | Alanine, aspartate and glutamate<br>metabolism                | 33                 | 0.00455                   | 0.0335                    | 0.01 (+)                               | Down        |
| hsa05120        | Epithelial cell signaling in Helicobacter<br>pylori infection | 64                 | 0.00471                   | 0.0004                    | 0.035 (-)                              | UP          |

|          |                                              |    |         |         |             |      |
|----------|----------------------------------------------|----|---------|---------|-------------|------|
| hsa05211 | Renal cell carcinoma                         | 70 | 0.00636 | 0.00251 | 0.415 (+)   | Down |
| hsa00980 | Metabolism of xenobiotics by cytochrome P450 | 63 | 0.00641 | 0.00003 | 0.1 (+)     | Down |
| hsa05221 | Acute myeloid leukemia                       | 56 | 0.0068  | 0.00198 | 0.475 (-)   | UP   |
| hsa00630 | Glyoxylate and dicarboxylate metabolism      | 17 | 0.00736 | 0.00044 | 0.015 (+)   | Down |
| hsa00310 | Lysine degradation                           | 46 | 0.01348 | 0.00014 | 0.125 (+)   | Down |
| hsa00380 | Tryptophan metabolism                        | 45 | 0.01465 | 0.00073 | 0.06 (+)    | Down |
| hsa04660 | T cell receptor signaling pathway            | 99 | 0.01599 | 0.00339 | 0.05 (-)    | UP   |
| hsa00410 | beta-Alanine metabolism                      | 22 | 0.0164  | 0.00055 | 0.025 (+)   | Down |
| hsa00120 | Primary bile acid biosynthesis               | 15 | 0.01684 | 0.00199 | 0.025 (+)   | Down |
| hsa00053 | Ascorbate and aldarate metabolism            | 20 | 0.01756 | 0.00006 | 0.01 (+)    | Down |
| hsa00260 | Glycine, serine and threonine metabolism     | 32 | 0.01791 | 0.00397 | 0.14 (+)    | Down |
| hsa03320 | PPAR signaling pathway                       | 64 | 0.01914 | 0.004   | 0.145 (+)   | Down |
| hsa00750 | Vitamin B6 metabolism                        | 6  | 0.0199  | 0.00382 | 0.005 (+)   | Down |
| hsa05142 | Chagas disease (American trypanosomiasis)    | 95 | 0.02658 | 0.00022 | 0.22 (-)    | UP   |
| hsa00040 | Pentose and glucuronate interconversions     | 28 | 0.03063 | 0.00115 | < 0.005 (+) | Down |
| hsa04912 | GnRH signaling pathway                       | 87 | 0.03433 | 0.00019 | 0.04 (-)    | UP   |
| hsa03440 | Homologous recombination                     | 28 | 0.03812 | 0.1554  | < 0.005 (-) | UP   |

|          |                                      |    |         |         |             |      |
|----------|--------------------------------------|----|---------|---------|-------------|------|
| hsa00860 | Porphyrin and chlorophyll metabolism | 39 | 0.04496 | 0.0002  | 0.14 (+)    | Down |
| hsa00983 | Drug metabolism - other enzymes      | 47 | 0.04674 | 0.00313 | 0.105 (+)   | Down |
| hsa04370 | VEGF signaling pathway               | 68 | 0.04699 | 0.00129 | < 0.005 (-) | UP   |
| hsa04012 | ErbB signaling pathway               | 87 | 0.059   | 0.00396 | 0.21 (-)    | UP   |
| hsa00270 | Cysteine and methionine metabolism   | 36 | 0.10414 | 0.00422 | 0.175 (+)   | Down |
| hsa05110 | Vibrio cholerae infection            | 51 | 0.19219 | 0.00315 | 0.225 (+)   | Down |
| hsa03050 | Proteasome                           | 42 | 0.29756 | 0.00001 | 0.24 (+)    | Down |
| hsa03010 | Ribosome                             | 86 | 0.92531 | 0.00159 | 0.255 (+)   | Down |

To address the molecular basis underlying the liver fibrosis progression, we examined serial hepatic gene expression profiles associated with liver fibrosis using RNA-Seq in 33 subjects. Baseline clinical characteristics in subjects for hepatic gene expression analyses are described in Supplementary Table 1.

Pathway analyses indicated that genes involved in fatty acid degradation, amino acids catabolism, glycolysis/gluconeogenesis, citrate cycle, drug, and xenobiotics metabolism were coordinately downregulated, whereas genes involved in the T cell receptor signaling pathway, the ErbB signaling pathway, and the VEGF signaling pathway were coordinately upregulated in the liver of subjects with hepatic fibrosis progression during the course.

Coordinated upregulation of genes involved in the T cell receptor signaling pathway and the ErbB signaling pathway suggests inflammation and hepatocellular injury leading to liver fibrosis. The epidermal growth factor receptor (EGFR) and its interactive signaling partner ErbB family of receptor tyrosine kinases have been implicated in liver fibrosis (Ref. 1). Activated hepatic stellate cells secrete vascular endothelial growth factor (VEGF) that plays a vital role in the development of liver fibrosis (Ref. 2). In the present study, genes involved in the VEGF signaling pathway were coordinately upregulated in association with fibrosis progression, which may be causal for hepatic stellate cell activation into myofibroblasts.

References.

- Ref. 1. Scheving LA, Zhang X, Threadgill DW, Russell WE: Hepatocyte ERBB3 and EGFR are required for maximal CCl4-induced liver fibrosis. Am J Physiol Gastrointest Liver Physiol 2016;311:G807-g816
- Ref. 2. Corpechot C, Barbu V, Wendum D, Kinnman N, Rey C, Poupon R, Housset C, Rosmorduc O: Hypoxia-induced VEGF and collagen I expressions are associated with angiogenesis and fibrogenesis in experimental cirrhosis. Hepatology 2002;35:1010-1021

Supplemental Table 6 Differential signaling pathways in the liver of NAFLD participants with HbA1c elevation

| KEGG<br>Pathway | Pathway description                                       | Number of<br>genes | LS permutation<br>p-value | KS permutation<br>p-value | Efron-Tibshirani's<br>test p-value | GSA | Up/Down |
|-----------------|-----------------------------------------------------------|--------------------|---------------------------|---------------------------|------------------------------------|-----|---------|
| hsa03050        | Proteasome                                                | 42                 | 0.00001                   | 0.00001                   | 0.015 (-)                          |     | Up      |
| hsa05130        | Pathogenic Escherichia coli infection                     | 53                 | 0.00001                   | 0.04826                   | 0.02 (-)                           |     | Up      |
| hsa04740        | Olfactory transduction                                    | 68                 | 0.00005                   | 0.00001                   | < 0.005 (+)                        |     | Down    |
| hsa00010        | Glycolysis / Gluconeogenesis                              | 62                 | 0.00073                   | 0.0133                    | 0.015 (-)                          |     | Up      |
| hsa00020        | Citrate cycle (TCA cycle)                                 | 30                 | 0.00112                   | 0.03017                   | < 0.005 (-)                        |     | Up      |
| hsa03030        | DNA replication                                           | 36                 | 0.00144                   | 0.01403                   | 0.09 (-)                           |     | Up      |
| hsa04966        | Collecting duct acid secretion                            | 25                 | 0.00202                   | 0.00298                   | 0.005 (-)                          |     | Up      |
| hsa00620        | Pyruvate metabolism                                       | 37                 | 0.00328                   | 0.04405                   | < 0.005 (-)                        |     | Up      |
| hsa00512        | Mucin type O-Glycan biosynthesis                          | 28                 | 0.02207                   | 0.00037                   | 0.015 (+)                          |     | Down    |
| hsa00062        | Fatty acid elongation                                     | 8                  | 0.02815                   | 0.00195                   | 0.005 (-)                          |     | Up      |
| hsa04742        | Taste transduction                                        | 24                 | 0.04657                   | 0.09645                   | < 0.005 (+)                        |     | Down    |
| hsa04730        | Long-term depression                                      | 63                 | 0.0718                    | 0.09689                   | < 0.005 (+)                        |     | Down    |
| hsa03450        | Non-homologous end-joining                                | 13                 | 0.09222                   | 0.00153                   | 0.27 (+)                           |     | Down    |
| hsa04970        | Salivary secretion                                        | 68                 | 0.2263                    | 0.07484                   | < 0.005 (+)                        |     | Down    |
| hsa04070        | Phosphatidylinositol signaling system                     | 77                 | 0.24415                   | 0.14145                   | < 0.005 (+)                        |     | Down    |
| hsa05412        | Arrhythmogenic right ventricular<br>cardiomyopathy (ARVC) | 72                 | 0.36299                   | 0.21378                   | < 0.005 (+)                        |     | Down    |

To address the molecular basis underlying the liver fibrosis progression, we examined serial hepatic gene expression profiles associated with glycemic control using RNA-Seq in 33 subjects. Baseline clinical characteristics in subjects for hepatic gene expression analyses are described

in Supplementary Table 1.

Pathway analyses indicated that genes involved in the proteasome, glycolysis/gluconeogenesis, pyruvate metabolism, citrate cycle, fatty acid elongation, phosphatidylinositol signaling system, pathogenic *E. coli* infection, and DNA replication are coordinately upregulated in the liver of subjects with HbA1c elevation during the course. These alterations may be the cause and consequence of inadequately controlled diabetes.
